# Supplementary material for: Iron and nitrogen co-functionalized porous 3D graphene frameworks as an efficient oxygen reduction catalyst
Source: Royal Society of Chemistry journal article supplement (doi:10.1039/c6ra17670d), 2016-01-01
Supplement: c6ra17670d1.pdf [file c6ra17670d1.pdf]

## Iron and nitrogen co-functionalized porous 3D graphene framework as an efficient oxygen reduction catalyst

Lili Cui <sup>b</sup>, Mei Wu <sup>b</sup>, Jinbao Xiang <sup>a\*</sup>

<sup>a</sup>The Center for Combinatorial Chemistry and Drug Discovery of Jilin University, The School of Pharmaceutical Sciences, Jilin University, 1266 Fujin Road, Changchun, Jilin 130021, P. R. China

<sup>b</sup>Key Laboratory of Applied Chemistry and Nanotechnology at Universities of Jilin Province, Department of Chemistry and Chemical Engineering, Changchun University of Science and Technology, Changchun 130022, P. R. China

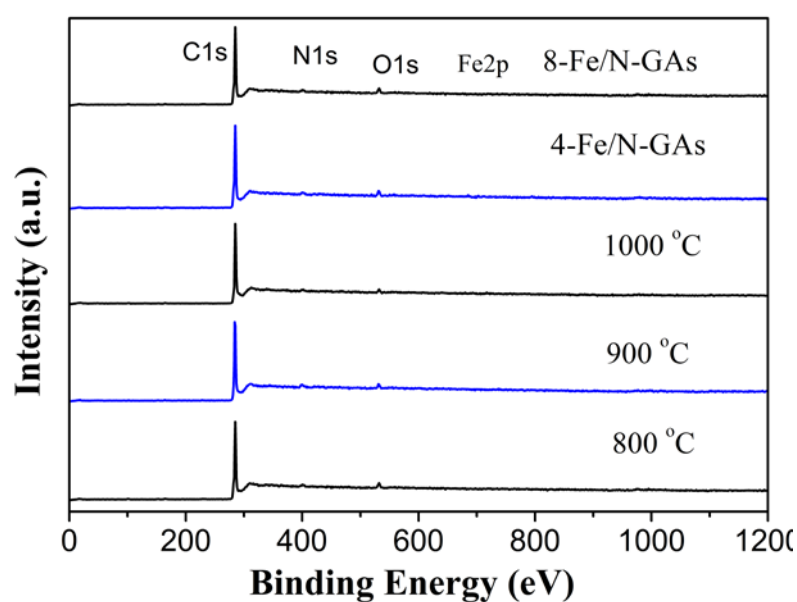

Fig. S1 XPS survey of different samples.

Corresponding author:

\* E-mail: jbxiang@jlu.edu.cn (Jinbao Xiang)

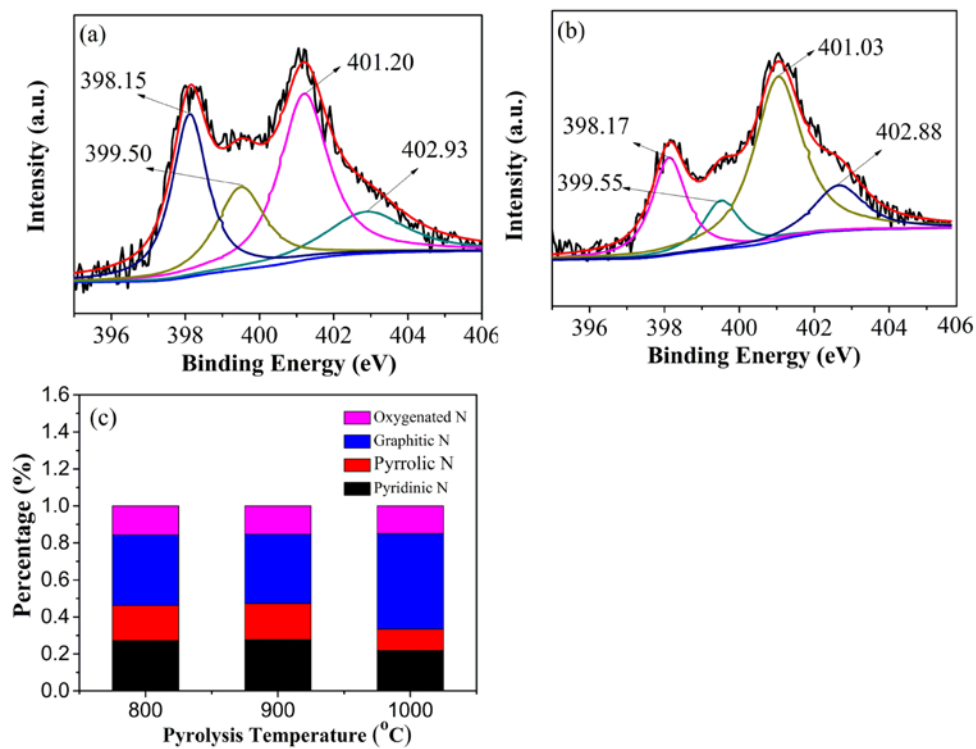

Fig. S2 High resolution XPS N1s spectrum of N-GAs 800 (a), N-GAs 900 (b) and percentage variation of nitrogen functionalities N-GAs pyrolyzed at different temperature (c).

Table S1 Electrochemical parameters of samples for ORR estimated from LSV at 1600 rpm.

| Samples    | $E_{\text{onest}}$<br>(V) | $E_{1/2}$<br>(V) | $J_L$<br>(mA cm <sup>-2</sup> ) |
|------------|---------------------------|------------------|---------------------------------|
| N-G        | -0.15                     | -0.32            | 5.83                            |
| GAs@PDAP   | -0.22                     | -0.38            | 2.60                            |
| GAs        | -0.09                     | -0.29            | 5.40                            |
| N-GAs      | -0.05                     | -0.22            | 6.36                            |
| 4-Fe/N-GAs | -0.04                     | -0.21            | 6.65                            |
| 8-Fe/N-GAs | 0                         | -0.17            | 4.30                            |
| Pt/C       | 0.03                      | -0.14            | 5.82                            |

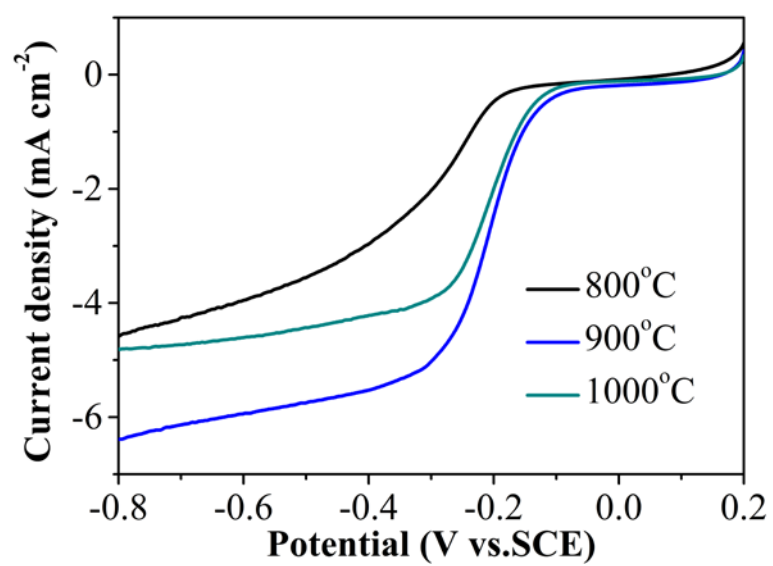

Fig. S3 LSV curves of N-GAs pyrolyzed at different temperature at 1600 rpm in 0.1 M KOH saturated with O<sub>2</sub> at the scan rate of 10 mV s<sup>-1</sup>.
